# Supplementary material for: Nutrient Composition of Retail Samples of Australian Beef Sausages
Source: Nutrients. 2015 Nov 19;7(11):9602–17. doi: 10.3390/nu7115491 (PMC4663619; doi:10.3390/nu7115491)
Supplement: Supplementary file 1 [file nutrients-07-05491-s001.xlsx]

## Sheet: Individual vs composite
Table S1. Comparision of phase 1 & 2 raw sausage values
	Mass g/sausage	Moisture g/100 g wet weight	Fat g/100 g wet weight	Protein g/100 g wet weight	Moisture g/sausage	Fat g/sausage	Protein g/sausage	Dry mass g/100 g	Fat g/100 g dry weight	Protein g/100 g dry weight
Phase 1 samples, individual samples, not frozen before analysis
Mean lower fat group	76	67	10	14.7	50.92	7.6	11.172	33	30.303	33.8545
Mean medium fat group	85	63.9	13.8	14.2	54.315	11.73	12.07	36.1	38.2271	33.4349
Mean higher fat content group	93	58.7	18.8	13.5	54.591	17.484	12.555	41.3	45.5206	30.3995
Phase 2 samples, composite samples prepared from sausages that had been frozen
Lower fat group	74	62.2	12.8	16.4	46.028	9.472	12.136	37.8	33.8624	32.1058
Medium fat group	83	63.2	15.2	14	52.456	12.616	11.62	36.8	41.3043	31.5761
Higher fat content group	93	58.1	20.5	12.7	54.033	19.065	11.811	41.9	48.926	28.1885
Notes:
All samples are uncooked
Dry matter:	100 minus moisture content
Fat & protein dry basis:	Fat content per 100 g wet weight, divided by dry matter, multiplied by 100

## Sheet: Phase 1 results
Table S2. Fatty acid profiles
	Mass g/sausage	Moisture g/100 g wet weight	Fat g/100 g wet weight	Protein g/100 g wet weight	Moisture g/sausage	Fat g/sausage	Protein g/sausage	Dry mass g/100 g	Fat g/100 g dry weight	Protein g/100 g dry weight
Phase 1 samples, individual samples, not frozen before analysis
Mean lower fat group	76	67	10	14.7	50.92	7.6	11.172	33	30.303	33.8545
Mean medium fat group	85	63.9	13.8	14.2	54.315	11.73	12.07	36.1	38.2271	33.4349
Mean higher fat content group	93	58.7	18.8	13.5	54.591	17.484	12.555	41.3	45.5206	30.3995
Phase 2 samples, composite samples prepared from sausages that had been frozen
Lower fat group	74	62.2	12.8	16.4	46.028	9.472	12.136	37.8	33.8624	32.1058
Medium fat group	83	63.2	15.2	14	52.456	12.616	11.62	36.8	41.3043	31.5761
Higher fat content group	93	58.1	20.5	12.7	54.033	19.065	11.811	41.9	48.926	28.1885
Notes:
All samples are uncooked
Dry matter:	100 minus moisture content
Fat & protein dry basis:	Fat content per 100 g wet weight, divided by dry matter, multiplied by 100
